# Supplementary material for: When Kinesthesia Becomes Visual: A Theoretical Justification for Executing Motor Tasks in Visual Space
Source: PubMed Central journal article supplement (PMC3702599; doi:10.1371/journal.pone.0068438), 2013-07-05
Supplement: pone.0068438.s001.pdf [file pone.0068438.s001.pdf]

## Equations for optimal sensory weighting in case of correlated signals

Define  $z$  as the weighted sum of  $x$  and  $y$ :

$$z_i = w_x x_i + w_y y_i = \lambda x + (1 - \lambda)y \quad (\text{S1})$$

Without loss of generality, let  $z$  have a mean of zero. The variance of  $z$  is:

$$\sigma_z^2 = \frac{1}{n} \sum_{i=1}^n z_i^2 \quad (\text{S2})$$

$$\sigma_z^2 = \frac{1}{n} \sum_{i=1}^n [\lambda x_i + (1 - \lambda)y_i]^2 \quad (\text{S3})$$

$$\sigma_z^2 = \frac{1}{n} \sum_{i=1}^n [\lambda^2 x_i^2 + (1 - \lambda)^2 y_i^2 + 2\lambda(1 - \lambda)x_i y_i] \quad (\text{S4})$$

$$\sigma_z^2 = \frac{1}{n} \sum_{i=1}^n [\lambda^2 x_i^2 + (1 - 2\lambda + \lambda^2)y_i^2 + 2(\lambda - \lambda^2)x_i y_i] \quad (\text{S5})$$

$$\sigma_z^2 = \lambda^2 \frac{1}{n} \sum_{i=1}^n x_i^2 + (1 - 2\lambda + \lambda^2) \frac{1}{n} \sum_{i=1}^n y_i^2 + 2(\lambda - \lambda^2) \frac{1}{n} \sum_{i=1}^n x_i y_i \quad (\text{S6})$$

$$\sigma_z^2 = \lambda^2 \sigma_x^2 + (1 - 2\lambda + \lambda^2) \sigma_y^2 + 2(\lambda - \lambda^2) \text{cov}(x, y) \quad (\text{S7})$$

Find the  $\lambda$  that minimizes  $\sigma_z^2$ :

$$\frac{d\sigma_z^2}{d\lambda} = 2\lambda\sigma_x^2 + (2\lambda - 2)\sigma_y^2 + 2(1 - 2\lambda)\text{cov}(x, y) = 0 \quad (\text{S8})$$

$$2\lambda(\sigma_x^2 + \sigma_y^2 - 2\text{cov}(x, y)) - 2\sigma_y^2 + 2\text{cov}(x, y) = 0 \quad (\text{S9})$$

$$\lambda(\sigma_x^2 + \sigma_y^2 - 2\text{cov}(x, y)) - \sigma_y^2 + \text{cov}(x, y) = 0 \quad (\text{S10})$$

$$\lambda(\sigma_x^2 + \sigma_y^2 - 2\text{cov}(x, y)) = \sigma_y^2 - \text{cov}(x, y) \quad (\text{S11})$$

$$\lambda = \frac{\sigma_y^2 - \text{cov}(x, y)}{\sigma_x^2 + \sigma_y^2 - 2\text{cov}(x, y)} \quad (\text{S12})$$

$$w_x = \lambda = \frac{\sigma_y^2 - \text{cov}(x, y)}{(\sigma_x^2 - \text{cov}(x, y)) + (\sigma_y^2 - \text{cov}(x, y))} \quad (\text{S13})$$

$$w_y = (1 - \lambda) = 1 - \frac{\sigma_y^2 - \text{cov}(x, y)}{(\sigma_x^2 - \text{cov}(x, y)) + (\sigma_y^2 - \text{cov}(x, y))} \quad (\text{S14})$$

$$w_y = \frac{(\sigma_x^2 - \text{cov}(x, y)) + (\sigma_y^2 - \text{cov}(x, y))}{(\sigma_x^2 - \text{cov}(x, y)) + (\sigma_y^2 - \text{cov}(x, y))} - \frac{\sigma_y^2 - \text{cov}(x, y)}{(\sigma_x^2 - \text{cov}(x, y)) + (\sigma_y^2 - \text{cov}(x, y))} \quad (\text{S15})$$

$$w_y = \frac{\sigma_x^2 - \text{cov}(x, y)}{(\sigma_x^2 - \text{cov}(x, y)) + (\sigma_y^2 - \text{cov}(x, y))} \quad (\text{S16})$$
